# Supplementary material
Source: PubMed Central journal article supplement (PMC7202935)
Supplement: mmc1.pdf [file mmc1.pdf]

**Biophysical Journal, Volume 118**

**Supplemental Information**

**Structural and Dynamical Signatures of Local DNA Damage in Live  
Cells**

**Jonah A. Eaton and Alexandra Zidovska**

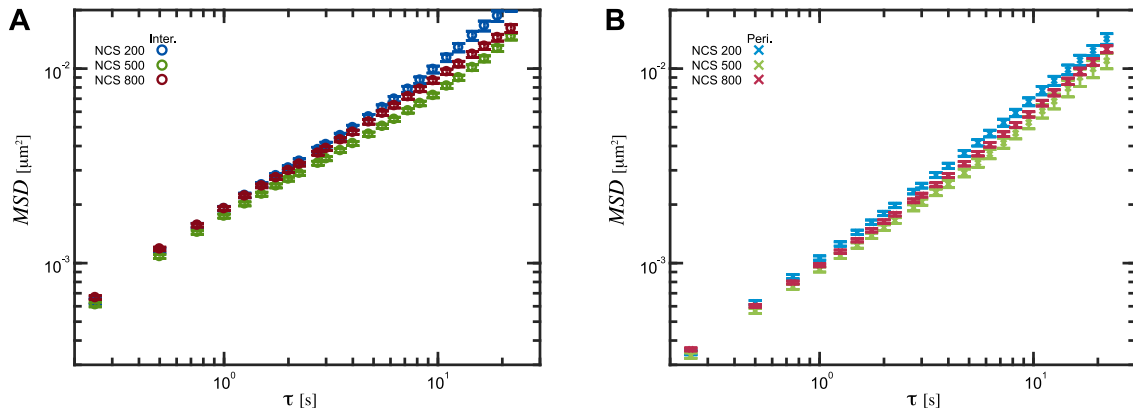

**Supplementary Figure 1:** DSB dynamics as a function of the DSB position and NCS concentration. (A) Average *MSD* for the interior DSBs from Fig. 2E plotted with error bars (standard error). (B) Average *MSD* for the periphery DSBs from Fig. 2E plotted with error bars (standard error).

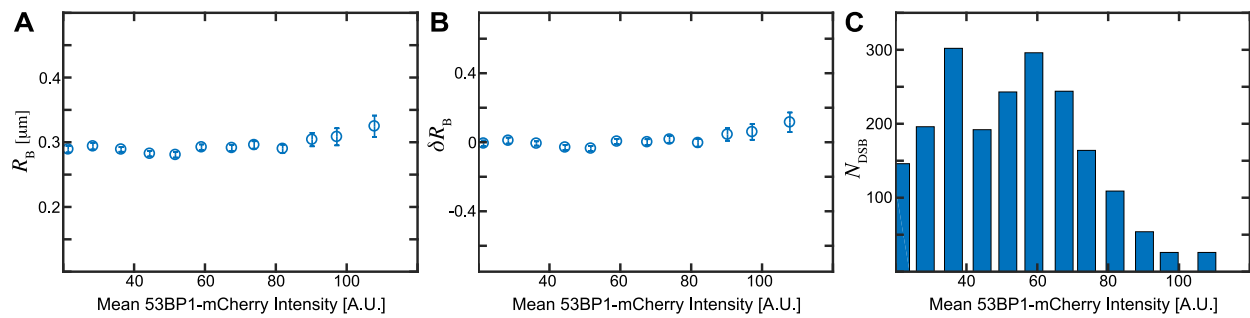

**Supplementary Figure 2:** The 53BP1 focus size vs. the 53BP1-mCherry expression. **(A)** Size of a DSB focus,  $R_B$ , as a function of the mean 53BP1-mCherry intensity in the cell nucleus measured for 2052 interior DSBs in 356 cell nuclei. **(B)** Relative change of  $R_B$ ,  $\delta R_B$ , as a function of the mean 53BP1-mCherry intensity across the cell nucleus, where  $\delta R_B = (R_B - \langle R_B \rangle) / \langle R_B \rangle$ . **(C)** Histogram depicting the number of DSBs evaluated at a given mean 53BP1-mCherry intensity. No correlation was found between the 53BP1 focus size and the 53BP1-mCherry expression. Error bars shown are standard errors.

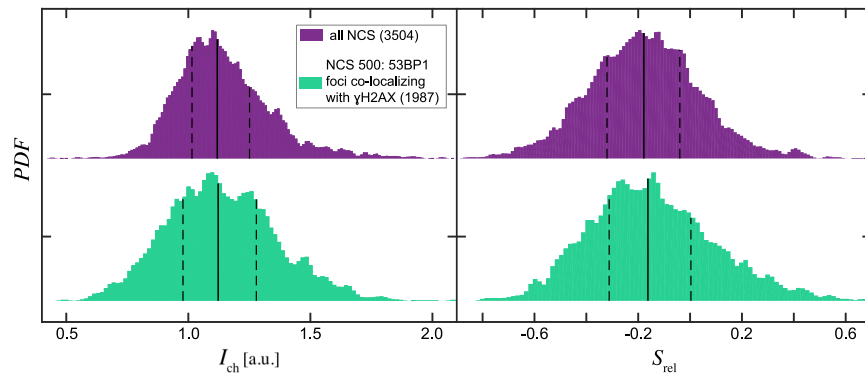

**Supplementary Figure 3:** Unique chromatin compaction profile at DSBs. Distributions of  $I_{ch}$  and  $S_{rel}$  including both the interior and periphery 53BP1 foci from NCS-treated nuclei from Fig. 4 (*purple*) and for the 53BP1 foci co-localizing with  $\gamma$ H2AX from Fig. 1D (*green*).

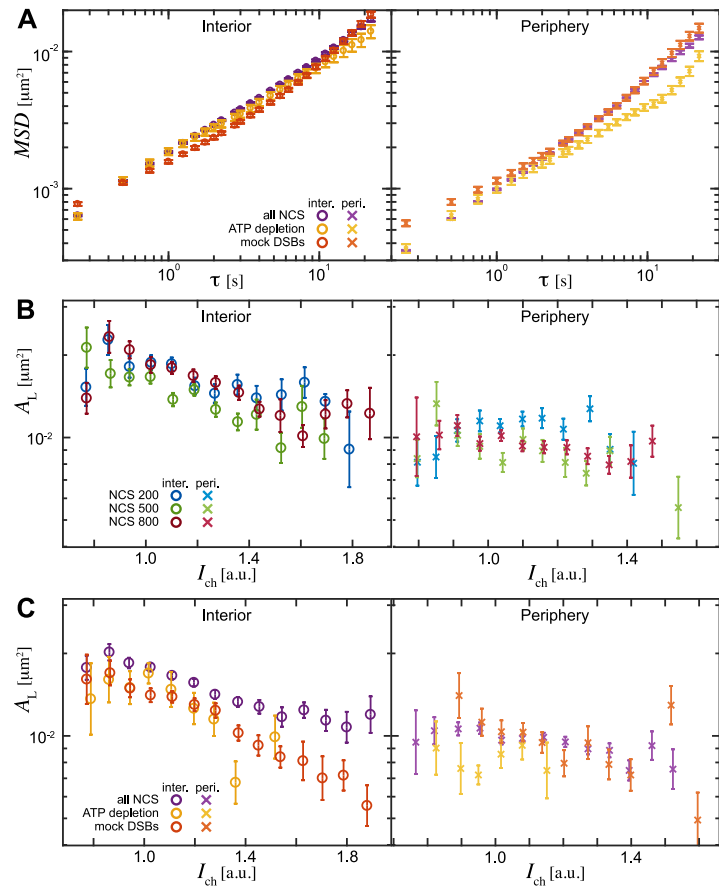

**Supplementary Figure 4:** Negative control for the DSB dynamics. (A) Average  $MSD$  from Fig. 4D plotted with error bars (standard error). (B) Relationship between the long-term DSB mobility ( $A_L$ ) and the local chromatin compaction ( $I_{ch}$ ) for three NCS concentrations plotted with error bars (standard error). (C) Relationship between the long-term DSB mobility ( $A_L$ ) and the local chromatin compaction ( $I_{ch}$ ) from Fig. 4E with plotted with error bars (standard error).

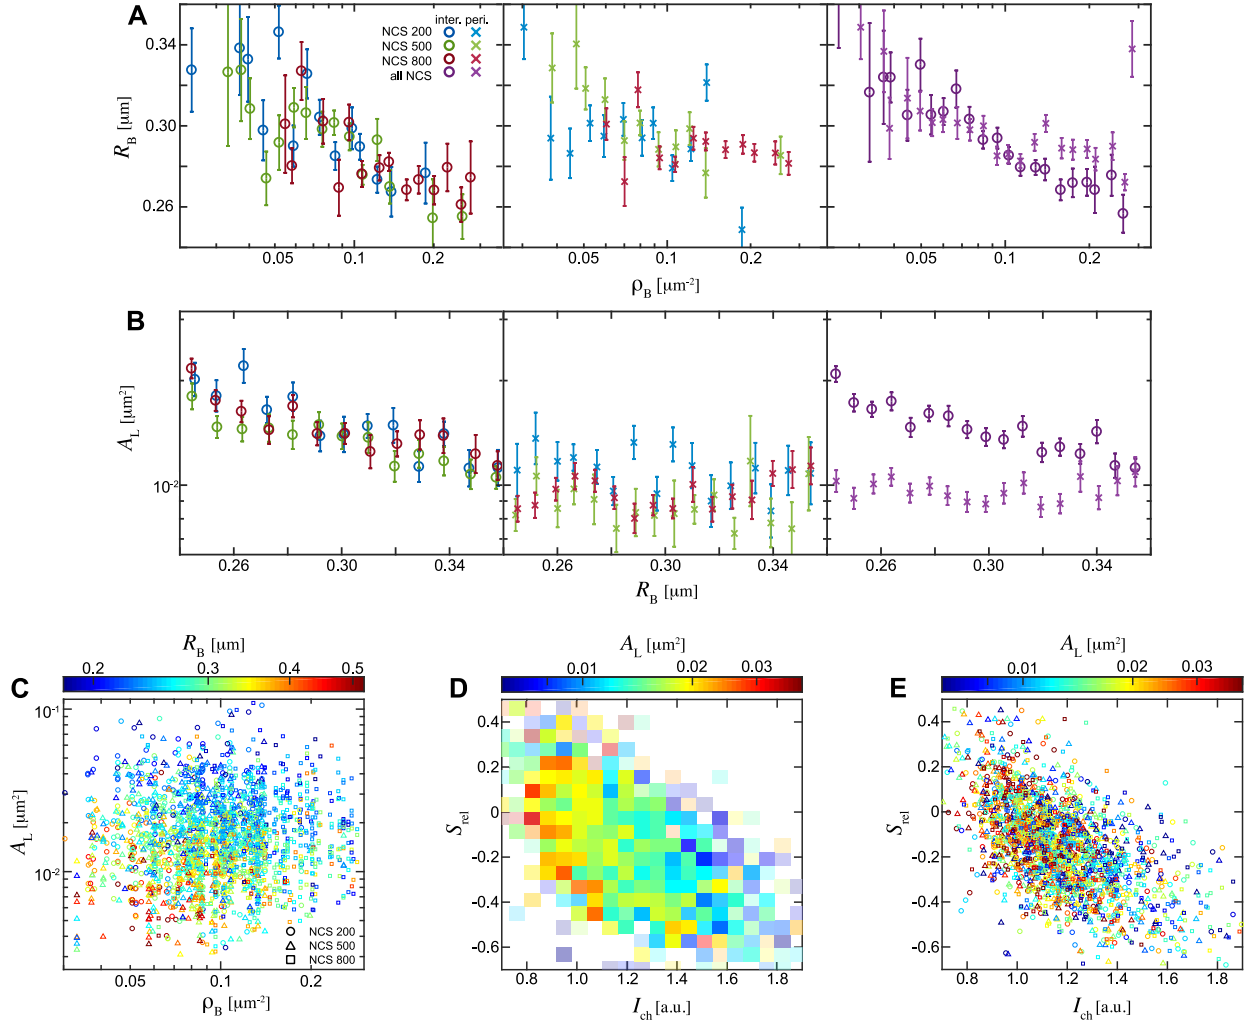

**Supplementary Figure 5:** Universal behavior of the DSB dynamics. **(A)** Relationship between the DSB focus size ( $R_B$ ) and nuclear DSB density ( $\rho_B$ ) from Fig. 5A plotted with error bars (standard error). **(B)** Relationship between the long-term DSB mobility ( $A_L$ ) and the DSB focus size ( $R_B$ ) from Fig. 5B plotted with error bars (standard error). **(C)**  $R_B$  as a function of  $A_L$  and  $\rho_B$  for each analyzed DSB in the nuclear interior across all NCS concentrations: NCS 200 (circles), NCS 500 (triangles) and NCS 800 (squares). **(D)** Average value of  $A_L$  as a function of  $S_{\text{rel}}$  and  $I_{\text{ch}}$  for analyzed DSBs in the nuclear interior across all NCS concentrations. Boxes with greater transparency present average over fewer DSBs. **(E)**  $A_L$  as a function of  $S_{\text{rel}}$  and  $I_{\text{ch}}$  for each analyzed DSB in the nuclear interior across all NCS concentrations: NCS 200 (circles), NCS 500 (triangles) and NCS 800 (squares).

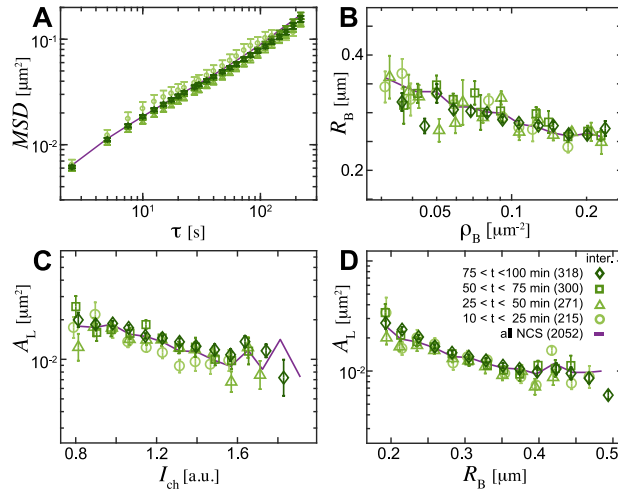

**Supplementary Figure 6:** DSB dynamics as a function of time upon DNA damage induction. (A) Average  $MSD$  for the interior DSBs analyzed during 10 - 25 min (circles,  $N_{\text{DSB}} = 215$ ,  $N_{\text{Cells}} = 42$ ), 25 - 50 (triangles,  $N_{\text{DSB}} = 271$ ,  $N_{\text{Cells}} = 47$ ), 50 - 75 min (squares,  $N_{\text{DSB}} = 300$ ,  $N_{\text{Cells}} = 49$ ) and 75 - 100 min (diamonds,  $N_{\text{DSB}} = 318$ ,  $N_{\text{Cells}} = 54$ ) after NCS 500ng/mL addition. Purple line ( $N_{\text{DSB}} = 2052$ ,  $N_{\text{Cells}} = 356$ ) represents data from Fig. 5C collected at 60 min mark. (B)  $R_B$  as a function of  $\rho_B$  for DSBs analyzed at different times. (C)  $A_L$  as a function of  $I_{\text{ch}}$  for DSBs analyzed at different times. (D)  $A_L$  as a function of  $R_B$  for DSBs analyzed at different times. Error bars shown are standard errors.

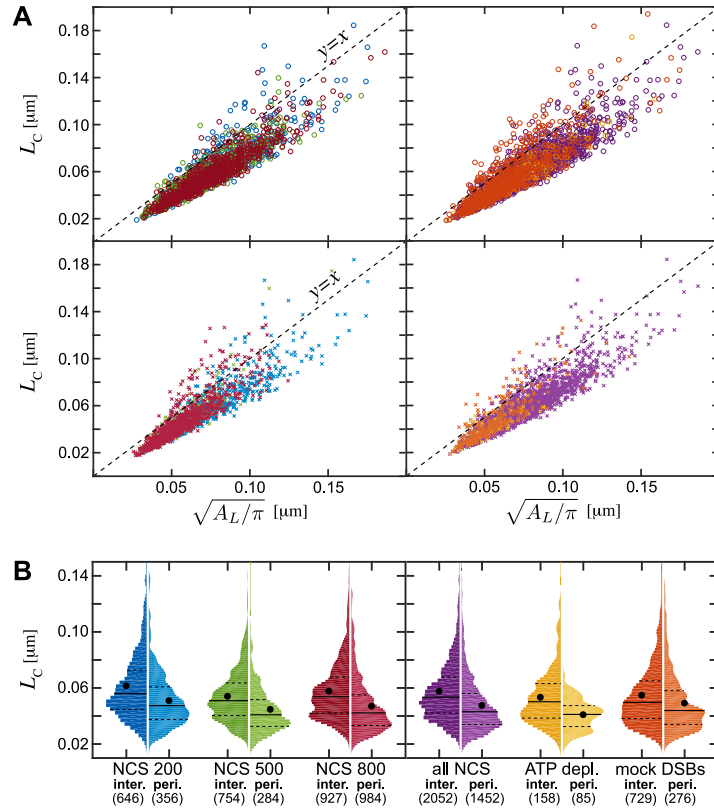

**Supplementary Figure 7:** Comparison of the long-term mobility,  $A_L$ , and the length of constraint,  $L_C$ , for a DSB focus trajectory. **(A)**  $L_C$  as a function  $\sqrt{A_L/\pi}$  shows linear dependence suggesting that the two measures are equivalent. The length of constraint,  $L_C$ , is defined as the standard deviation of the centroid position of a DSB focus with respect to its temporal average [35]. **(B)**  $L_C$  distributions calculated for all individual DSB trajectories presented in the DSB populations from Figs. 2 and 5.



**Supplementary Table 1:** Summary of the characteristics (mean  $\pm$  SE) of the DSB dynamics for the interior and periphery DSBs at 3 different NCS concentrations.

|                                    | NCS 200                  |                          | NCS 500                  |                          | NCS 800                  |                          |
|------------------------------------|--------------------------|--------------------------|--------------------------|--------------------------|--------------------------|--------------------------|
| $N_{\text{Cell}} \text{ (total)}$  | 107                      |                          | 121                      |                          | 131                      |                          |
| $\rho_B$<br>[ $\#/\mu\text{m}^2$ ] | 0.077<br>$\pm 0.003$     |                          | 0.084<br>$\pm 0.003$     |                          | 0.145<br>$\pm 0.005$     |                          |
|                                    | <i>inter.</i>            | <i>peri.</i>             | <i>inter.</i>            | <i>peri.</i>             | <i>inter.</i>            | <i>peri.</i>             |
| $N_{\text{Cell}}$                  | 107                      | 99                       | 121                      | 100                      | 128                      | 131                      |
| $N_{\text{DSB}}$                   | 610                      | 336                      | 682                      | 254                      | 760                      | 862                      |
| $A_s$<br>[ $\mu\text{m}^2$ ]       | 0.00064<br>$\pm 0.00002$ | 0.00035<br>$\pm 0.00001$ | 0.00061<br>$\pm 0.00002$ | 0.00034<br>$\pm 0.00001$ | 0.00067<br>$\pm 0.00001$ | 0.00036<br>$\pm 0.00001$ |
| $\alpha$                           | 0.675<br>$\pm 0.008$     | 0.717<br>$\pm 0.012$     | 0.607<br>$\pm 0.007$     | 0.625<br>$\pm 0.015$     | 0.634<br>$\pm 0.007$     | 0.652<br>$\pm 0.008$     |
| $A_L$<br>[ $\mu\text{m}^2$ ]       | 0.0207<br>$\pm 0.0006$   | 0.0126<br>$\pm 0.0004$   | 0.0171<br>$\pm 0.0004$   | 0.0103<br>$\pm 0.0004$   | 0.0195<br>$\pm 0.0005$   | 0.0112<br>$\pm 0.0002$   |
| $R_B$<br>[ $\mu\text{m}$ ]         | 0.301<br>$\pm 0.003$     | 0.296<br>$\pm 0.003$     | 0.295<br>$\pm 0.003$     | 0.298<br>$\pm 0.003$     | 0.280<br>$\pm 0.002$     | 0.289<br>$\pm 0.002$     |
| $S_{\text{rel}}$                   | -0.142<br>$\pm 0.009$    | -0.162<br>$\pm 0.013$    | -0.134<br>$\pm 0.008$    | -0.168<br>$\pm 0.015$    | -0.176<br>$\pm 0.008$    | -0.240<br>$\pm 0.007$    |
| $I_{\text{ch}}$                    | 1.158<br>$\pm 0.009$     | 1.088<br>$\pm 0.008$     | 1.144<br>$\pm 0.008$     | 1.095<br>$\pm 0.012$     | 1.209<br>$\pm 0.008$     | 1.118<br>$\pm 0.005$     |

$N_{\text{Cell}}$  - number of cells analyzed

$N_{\text{DSB}}$  - number of DSBs analyzed

$\rho_B$  - number of DSBs per unit area

$A_s$  - area explored by a DSB in 250 ms

$\alpha$  - exponent obtained from fitting the  $MSD$  to  $f(\tau) = C + B\tau^\alpha$

$A_L$  - area explored by a DSB in 25 s

$R_B$  - radius of a 53BP1 focus

$S_{\text{rel}}$  - slope of a linear fit to radially averaged H2B-GFP intensity around a DSB

$I_{\text{ch}}$  - normalized H2B-GFP intensity at the DSB centroid

**Supplementary Table 2:** Summary of the  $p$ -values (Kolmogorov-Smirnov test) for all measured physical quantities in the nuclear interior and periphery across 3 different NCS concentrations.

|           | NCS 200 vs NCS 500<br>inter vs inter | NCS 200 vs NCS 800<br>inter vs inter | NCS 500 vs NCS 800<br>inter vs inter |
|-----------|--------------------------------------|--------------------------------------|--------------------------------------|
| $A_s$     | $4.2 \times 10^{-1}$                 | $4.4 \times 10^{-5}$                 | $1.7 \times 10^{-3}$                 |
| $\alpha$  | $3.7 \times 10^{-7}$                 | $1.8 \times 10^{-3}$                 | $1.9 \times 10^{-2}$                 |
| $A_L$     | $3.5 \times 10^{-3}$                 | $4.9 \times 10^{-1}$                 | $7.0 \times 10^{-4}$                 |
| $R_B$     | $2.5 \times 10^{-1}$                 | $1.0 \times 10^{-7}$                 | $4.8 \times 10^{-4}$                 |
| $S_{rel}$ | $9.5 \times 10^{-1}$                 | $4.1 \times 10^{-3}$                 | $3.6 \times 10^{-3}$                 |
| $I_{ch}$  | $5.9 \times 10^{-1}$                 | $9.6 \times 10^{-5}$                 | $3.9 \times 10^{-5}$                 |
|           | NCS 200 vs. NCS 200<br>peri vs inter | NCS 500 vs. NCS 500<br>peri vs inter | NCS 800 vs. NCS 800<br>peri vs inter |
| $A_s$     | 0                                    | 0                                    | 0                                    |
| $\alpha$  | $1.1 \times 10^{-3}$                 | $2.2 \times 10^{-2}$                 | $4.0 \times 10^{-3}$                 |
| $A_L$     | 0                                    | 0                                    | 0                                    |
| $R_B$     | $6.0 \times 10^{-3}$                 | $7.1 \times 10^{-4}$                 | $6.3 \times 10^{-9}$                 |
| $S_{rel}$ | $4.8 \times 10^{-2}$                 | $2.0 \times 10^{-2}$                 | $1.8 \times 10^{-8}$                 |
| $I_{ch}$  | $6.7 \times 10^{-7}$                 | $3.2 \times 10^{-3}$                 | 0                                    |
|           | NCS 200 vs NCS 500<br>peri vs peri   | NCS 200 vs NCS 800<br>peri vs peri   | NCS 500 vs NCS 800<br>peri vs peri   |
| $A_s$     | $2.2 \times 10^{-1}$                 | $8.2 \times 10^{-1}$                 | $4.1 \times 10^{-2}$                 |
| $\alpha$  | $1.1 \times 10^{-4}$                 | $8.0 \times 10^{-4}$                 | $1.6 \times 10^{-1}$                 |
| $A_L$     | $3.8 \times 10^{-6}$                 | $2.1 \times 10^{-6}$                 | $3.4 \times 10^{-1}$                 |
| $R_B$     | $1.8 \times 10^{-1}$                 | $3.5 \times 10^{-2}$                 | $6.3 \times 10^{-4}$                 |
| $S_{rel}$ | $4.2 \times 10^{-1}$                 | $1.4 \times 10^{-6}$                 | $1.3 \times 10^{-4}$                 |
| $I_{ch}$  | $3.5 \times 10^{-1}$                 | $1.8 \times 10^{-2}$                 | $4.2 \times 10^{-3}$                 |

**Supplementary Table 3:** Summary of the characteristics (mean  $\pm$  SE) of DSB dynamics for the interior and periphery DSBs for the negative control (mock DSBs) and upon ATP depletion.

|                           | All NCS                  |                          | ATP dep                  |                          | Mock DSB                 |                          |
|---------------------------|--------------------------|--------------------------|--------------------------|--------------------------|--------------------------|--------------------------|
| $N_{\text{Cell}} (total)$ | 359                      |                          | 38                       |                          | 83                       |                          |
|                           | <i>inter.</i>            | <i>peri.</i>             | <i>inter.</i>            | <i>peri.</i>             | <i>inter.</i>            | <i>peri.</i>             |
| $N_{\text{Cells}}$        | 356                      | 330                      | 37                       | 29                       | 83                       | 74                       |
| $N_{\text{DSB}}$          | 2052                     | 1452                     | 158                      | 85                       | 729                      | 276                      |
| $A_s$<br>[ $\mu m^2$ ]    | 0.00064<br>$\pm 0.00001$ | 0.00035<br>$\pm 0.00001$ | 0.00063<br>$\pm 0.00003$ | 0.00037<br>$\pm 0.00003$ | 0.00077<br>$\pm 0.00002$ | 0.00056<br>$\pm 0.00003$ |
| $\alpha$                  | 0.637<br>$\pm 0.004$     | 0.662<br>$\pm 0.006$     | 0.580<br>$\pm 0.013$     | 0.572<br>$\pm 0.019$     | 0.587<br>$\pm 0.009$     | 0.584<br>$\pm 0.015$     |
| $A_L$<br>[ $\mu m^2$ ]    | 0.0190<br>$\pm 0.0003$   | 0.0113<br>$\pm 0.0002$   | 0.0171<br>$\pm 0.0010$   | 0.0092<br>$\pm 0.0005$   | 0.0151<br>$\pm 0.0004$   | 0.0115<br>$\pm 0.0005$   |
| $S_{\text{rel}}$          | -0.152<br>$\pm 0.005$    | -0.209<br>$\pm 0.006$    | -0.088<br>$\pm 0.016$    | -0.074<br>$\pm 0.024$    | -0.125<br>$\pm 0.009$    | -0.173<br>$\pm 0.016$    |
| $I_{\text{ch}}$           | 1.172<br>$\pm 0.005$     | 1.107<br>$\pm 0.004$     | 1.094<br>$\pm 0.015$     | 1.014<br>$\pm 0.014$     | 1.200<br>$\pm 0.009$     | 1.132<br>$\pm 0.010$     |

$N_{\text{Cell}}$  - number of cells analyzed

$N_{\text{DSB}}$  - number of DSBs analyzed

$A_s$  - area explored by a DSB in 250 ms

$\alpha$  - exponent obtained from fitting the  $MSD$  to  $f(\tau) = C + B\tau^\alpha$

$A_L$  - area explored by a DSB in 25 s

$S_{\text{rel}}$  - slope of a linear fit to radially averaged H2B-GFP intensity around a DSB

$I_{\text{ch}}$  - normalized H2B-GFP intensity at the DSB centroid

**Supplementary Table 4:** Summary of the  $p$ -values (Kolmogorov Smirnov test) for all measured physical quantities for the interior and periphery DSBs for the negative control (mock DSBs) and upon ATP depletion.

|           | all NCS vs ATP dep<br>inter vs inter | all NCS vs Mock DSB<br>inter vs inter | ATP dep vs Mock DSB<br>inter vs inter |
|-----------|--------------------------------------|---------------------------------------|---------------------------------------|
| $A_s$     | $4.9 \times 10^{-1}$                 | $2.2 \times 10^{-6}$                  | $2.2 \times 10^{-2}$                  |
| $\alpha$  | $1.6 \times 10^{-3}$                 | 0                                     | $9.0 \times 10^{-2}$                  |
| $A_L$     | $4.4 \times 10^{-2}$                 | 0                                     | $6.2 \times 10^{-2}$                  |
| $S_{rel}$ | $1.4 \times 10^{-3}$                 | $2.1 \times 10^{-1}$                  | $1.9 \times 10^{-2}$                  |
| $I_{ch}$  | $1.9 \times 10^{-6}$                 | $1.1 \times 10^{-1}$                  | $1.5 \times 10^{-7}$                  |
|           | all NCS vs all NCS<br>peri vs inter  | ATP dep vs ATP dep<br>peri vs inter   | Mock DSB vs Mock DSB<br>peri vs inter |
| $A_s$     | 0                                    | $3.8 \times 10^{-8}$                  | $5.8 \times 10^{-6}$                  |
| $\alpha$  | $1.1 \times 10^{-7}$                 | $6.9 \times 10^{-1}$                  | $5.1 \times 10^{-1}$                  |
| $A_L$     | 0                                    | $1.8 \times 10^{-8}$                  | $5.3 \times 10^{-7}$                  |
| $S_{rel}$ | 0                                    | $4.4 \times 10^{-1}$                  | $1.2 \times 10^{-3}$                  |
| $I_{ch}$  | 0                                    | $2.0 \times 10^{-3}$                  | $7.1 \times 10^{-5}$                  |
|           | all NCS vs ATP dep<br>peri vs peri   | all NCS vs Mock DSB<br>peri vs peri   | ATP dep vs Mock DSB<br>peri vs peri   |
| $A_s$     | $2.0 \times 10^{-1}$                 | 0                                     | $4.2 \times 10^{-4}$                  |
| $\alpha$  | $8.9 \times 10^{-6}$                 | $1.7 \times 10^{-8}$                  | $1.2 \times 10^{-1}$                  |
| $A_L$     | $3.4 \times 10^{-2}$                 | $4.5 \times 10^{-1}$                  | $8.2 \times 10^{-2}$                  |
| $S_{rel}$ | $3.2 \times 10^{-7}$                 | $3.1 \times 10^{-1}$                  | $2.0 \times 10^{-4}$                  |
| $I_{ch}$  | $1.1 \times 10^{-7}$                 | $1.0 \times 10^{-1}$                  | $1.6 \times 10^{-8}$                  |
